# Supplementary material for: LncRNA IMFNCR Promotes Intramuscular Adipocyte Differentiation by Sponging miR-128-3p and miR-27b-3p
Source: PubMed Central journal article supplement (PMC6378276; doi:10.3389/fgene.2019.00042), 2019-02-11
Supplement: Image_1.pdf [file Image_1.pdf]

**LncRNA IMFNCR promotes intramuscular adipocytes differentiation by sponging miR-128-3p and miR-27b-3p**

Meng Zhang, Fang Li, Jun-wei Sun, Dong-hua Li, Wen-ting Li, Rui-rui Jiang, Zhuan-jian Li, Xiao-jun Liu, Ruili Han, Guoxi Li, Yanbin Wang, Yadong Tian, Xiang-tao Kang and Gui-rong Sun\*

<sup>1</sup>College of Animal Science and Veterinary Medicine, Henan Agricultural University, Zhengzhou, 450002, China.

<sup>2</sup>Henan Innovative Engineering Research Center of Poultry Germplasm Resource, Zhengzhou 450002, China.

Correspondence and requests for materials should be addressed to G.-R.S. (email: [grsun2000@126.com](mailto:grsun2000@126.com))



00000301 gtgctcgtaataaccaagtgtatggggccaggctctgttcagcgggtgcc 00000350  
<<<<<<<< ||||| <<<<<<<<  
39393677 gtgctcgtaataaccaagtgtatggggccaggctctgttcagcgggtgcc 39393628

00000351 cagtggcaggacaaggggcagtgagcacaactggaatgtggaagtcca 00000400  
<<<<<<<< ||| <<<<<<<<  
39393627 cagcggcaggacaaggggcagtgagcacaactggaatgtggaagtcca 39393578

00000401 tacgaacgtgaggaggagctcctgcaactgtgacggtgacagagcactggg 00000450  
<<<<<<<< || <<<<<<<<  
39393577 tatgaacgtgaggagaaactccttcaactgtgacggtgacagagcactggg 39393528

00000451 acaggctgcccagagaggctgtggagtctccttctgtggagatattcaa 00000500  
<<<<<<<< ||||| <<<<<<<<  
39393527 acaggctgcccagagaggctgtggagtctccttctatggagatattcaa 39393478

00000501 atccacctggatgctttcctgtgagacctgcatcagagcagatgatctca 00000550  
<<<<<<<< ||||| <<<<<<<<  
39393477 atccacctggatgctttcctgtgagacctgcatcagagcagatgatctca 39393428

00000551 atgggaccctcctaaccctgaattctgtgtgattctgtgatttttaagt 00000600  
<<<<<<<< ||||| <<<<<<<<  
39393427 atgggaccctcctaaccctgaattctgtgtgattctgtgatttttaagt 39393378

00000601 gtattcagcaccatctcacttgccgctttgggacatctgtcgtgtagcca 00000650  
<<<<<<<< ||||| <<<<<<<<  
39393377 gtattcag...catctcacttgccgctttgggacatctgtcgtgtagcca 39393331

00000651 caatacttcacagcaatagaggctatagaatgtcagaaatttaatttct 00000700  
<<<<<<<< ||||| <<<<<<<<  
39393330 caatacttcacagcaatagaggctatagaacgtcagaaatttaatttct 39393281

00000701 taagttaaacttagagcaatattttcctgcctctaacttcccaggact 00000750  
<<<<<<<< ||||| <<<<<<<<  
39393280 taagttaaacttagagcaatattttcctgcctctaacttcccaggact 39393231

00000751 ttactgagctgctgtgcatatacgaagctgtgggaagataggtatgtgtt 00000800  
<<<<<<<< ||||| <<<<<<<<  
39393230 ttactgagctgctgtgcatatacgaagctgtgggaagataggtatgtgtt 39393181

00000801 taatttaaaaaaggctgatggttgtgtttacaggaattacattctagtc 00000850  
<<<<<<<< ||||| <<<<<<<<  
39393180 taatttaaaaaaggctgatggttgtgtttacaggaattacattctagtc 39393131

00000851 ttcatcctctctgcattcctttcattcaggggctcagactgtttacatg 00000900  
<<<<<<<< ||||| <<<<<<<<  
39393130 ttcatcctctctgcattcctttcattcaggggctcagactgtttacttg 39393081

00000901 gtccgcttcctggagttacgctaaaccctaaaggacaacattttgaatt 00000950  
<<<<<<<< ||| <<<<<<<<  
39393080 gtctgcttcctggagttacgctaaaccctaaaggacaacattttgaatt 39393031

00000951 ctaaagaagtctccttgggaaactcctcccagatgaatggtctgtgtgca 00001000  
<<<<<<<< ||||| <<<<<<<<  
39393030 ctaaagaagtctccttgggaaactcctcccagatgaatggtctgtgtgca 39392981

00001001 gagctggtgggaaccaacagctttaaatagtcagcatcagcacaaaatgt 00001050  
<<<<<<<< ||||| <<<<<<<<  
39392980 gagctggtgggaaccaacagctttaaatagtcagcatcagcacaaaatgt 39392931

00001051 ttttcggtagtcctgaaaccagggtactgcctgtgctccaggtgcttgt 00001100  
<<<<<<<< ||||| <<<<<<<<  
39392930 ttttcggtagtcctgaaaccagggtactgcctgtgctccaggtgcttgt 39392881

00001101 ttacctcttgaggtggccaagcatatgacatccttgggcctagcgtgcac 00001150  
<<<<<<<< ||||| <<<<<<<<  
39392880 ttacctcttgaggtggccaagcatatgacatccttgggcctagcgtgcac 39392831

00001151 cataactgcttactagctgtgttaattccttgaatttctttagagcaagc 00001200  
<<<<<<<< ||||| <<<<<<<<  
39392830 cataactgcttactagctgtgttaattccttgaatttctttagagcaagc 39392781

00001201 aaaatctttttgaacacagttccagcttcagctttggcctgattccttc 00001250  
<<<<<<<< ||||| <<<<<<<<  
39392780 aaaatctttttgaacacagttccagcttcagctttggcctgattccttc 39392731

00001251 tcttttgccaagagcaactgctgtccccatacgcagccatcaatgagaag 00001300  
<<<<<<<< ||||| <<<<<<<<  
39392730 tcttttgccaagagcaactgctgtccccatacgcagccatcaatgagaag 39392681

00001301 gcttcaggcctgtctgtgctgtccctcaagaccttctctaggttgta 00001350  
<<<<<<<< ||||| <<<<<<<<  
39392680 gcttcaggcctgtctgtgctgtccctcaagaccttctctaggttgta 39392631

00001351 catacaagtgtggcacaggcatcatccagtgttctcatgtttttccttc 00001400  
<<<<<<<< ||||| <<<<<<<<  
39392630 catacaagtgtggcacaggcatcatccagtgttctcatgtttttccttc 39392581

00001401 agactgttggttaatTTTTcactgctctccctgcatttcatagggtgaatc 00001450  
<<<<<<<< ||||||||||||||||||||||||||||||||||||||||||| <<<<<<<<<  
39392580 agactgttggttaatTTTTcactgctctccctgcatttcatagggtgaatc 39392531

00001451 tatagagctgtatgctacactgctgcagtgccaccacattgatgctact 00001500  
<<<<<<<< ||||||||||||||||||||||||||||||||||||||||||| <<<<<<<<<  
39392530 tatagagctgtatgctacactgctgcagtgccaccacattgatgctact 39392481

00001501 agcaggcgtcagagttccacggccaggagatgctaaagtgcccttctcag 00001550  
<<<<<<<< ||||||||||||||||||||||||||||||| | ||||||||||||||| <<<<<<<<<  
39392480 agcaggcgtcagagttccacggccaggagatgctaaagtgcccttctcag 39392431

00001551 cacttccagtgatgtcaaaaatcttgaaactgtttccctttctggaa 00001600  
<<<<<<<< ||||||||||||||||||||||||||||||||||||||||||| <<<<<<<<<  
39392430 cacttccagtgatgtcaaaaatcttgaaactgtttccctttctggaa 39392381

00001601 ggacctgaaattatttgtgaagattcttagaccatgtctatcaatctcc 00001650  
<<<<<<<< ||||||||||||||||||||||||||| ||||||||||||||| <<<<<<<<<  
39392380 ggacctgaaattatttgtgaagattcttagaccatgtctatcaatctcc 39392331

00001651 tgcttctcacataggcctgggcctttcctcagccaaggtcatcccca 00001697  
<<<<<<<< ||||||||||||||||||||||||||||||||||||||||||| <<<<<<<<<  
39392330 tgcttctcacataggcctgggcctttcctcagccaaggtcatcccca 39392284

00001710 gggggaaatttctgagaaaacagtcagatccatttaaagcaccct 00001759  
<<<<<<<< ||||||||||||||||||||||||||||||||||||||||||| <<<<<<<<<  
39392283 gggggaaatttctgagaaaacagtcagatccatttaaagcaccct 39392234

00001760 agctgctttcacttcccttgctgtgtctgttggagtgcgagtacagcct 00001809  
<<<<<<<< ||||||||||||||||||||||||||||||||||||||||||| <<<<<<<<<  
39392233 agctgctttcacttcccttgctgtgtctgttggagtgcgagtacagcct 39392184

00001810 gcagagctttaagacactggccctgccatccaaaactgaaacagtgcc 00001859  
<<<<<<<< ||||||||||||||||||||||||||||||||||||||||||| <<<<<<<<<  
39392183 gcagagctttaagacactggccctgccatccaaaactgaaacagtgcc 39392134

00001860 tcacctactaaaaggataatccagttccaatctcttctgttattttgat 00001909  
<<<<<<<< ||||||||||||||||||||||||||||||||||||||||||| <<<<<<<<<  
39392133 tcacctactaaaaggataatccagttccaatctcttctgttattttgat 39392084

00001910 atggcctgtggttttgatcaaattgctgtgaccagcacttaggaaggctt 00001959  
<<<<<<<< ||||||||||||||||||||||||||||||||||||||||||| <<<<<<<<<  
39392083 atggcctgtggttttgatcaaattgctgtgaccagcacttaggaaggctt 39392034



00002508 gccatcaatatgtagccatatcagaaagccagtcctcttccactgtatta 00002557  
<<<<<<<< ||||||||||||||||||||||||||||||||||||||||||| <<<<<<<<<  
39391483 gccatcaatatgtagccatatcagaaagccagtcctcttccactgtatta 39391434

00002558 aaaacatttcttaagagagtatcatagaatagtttgggttgaaggacc 00002607  
<<<<<<<< ||||||||||||||||||||||||||||||||||||||||||| <<<<<<<<<  
39391433 aaaacatttcttaagagagtatcatagaatagtttgggttgaaggacc 39391384

00002608 tttaagatatctggttccagccccctgctataggcaggacacctccctc 00002657  
<<<<<<<< ||||||||||||||||||||||||||| ||||||||||||||||||| <<<<<<<<<  
39391383 tttaagatatctggttccagccccctgccataggcaggacacctccctc 39391334

00002658 tagaccaggctgctcacagccccatccagcctggcctggaatgcttccag 00002707  
<<<<<<<< ||||||||||||||||||||||||||||||||||||||| ||||||||||| <<<<<<<<<  
39391333 tagaccaggctgctcacagccccatccagcctggcctggaatgcttccag 39391284

00002708 ggaggggcatcaagctttgctgggaaagattttaactttttaaagattt 00002757  
<<<<<<<< ||||||||||||| ||||||||||||||||||| ||||||||||| <<<<<<<<<  
39391283 ggaggggcatcaagccttgctgggaaagattttatctttttaaagattt 39391234

00002758 taatactttaaagatttttaaacagaaatcataagtagaatttaaatatt 00002807  
<<<<<<<< ||||||||||||||||||||||||||||||||||||||| <<<<<<<<<  
39391233 taatactttaaagatttttaaacagaaatcataagtagaatttaaatatt 39391184

00002808 ttagtaattagtttaataacctttgggaacattcataactgtagcatctgg 00002857  
<<<<<<<< ||||||||||||||||||||||||||||||||||||||| <<<<<<<<<  
39391183 ttagtaattagtttaataacctttgggaacattcataactgtagcatctgg 39391134

00002858 aactcaaaaccactccagttcagctccagctttaaactaagaagtggaaa 00002907  
<<<<<<<< ||||||||||||||||||||||||||||||||||||||| <<<<<<<<<  
39391133 aactcaaaaccactccagttcagctccagctttaaactaagaagtggaaa 39391084

00002908 acttccaaagagatgcattacaatgagctctatcagaacatccaggttga 00002957  
<<<<<<<< ||||||||||||||||||||||||||||||||||||||| <<<<<<<<<  
39391083 acttccaaagagatgcattacaatgagctctatcagaacatccaggttga 39391034

00002958 aatatcttcctttttcattatcagaaatggatctgcagtcaggcagtttc 00003007  
<<<<<<<< ||||||||||||||||||||||||||||||||||||||| <<<<<<<<<  
39391033 aatatcttcctttttcattatcagaaatggatctgcagtcaggcagtttc 39390984

00003008 cacagctccatatctagatatacaggaaaaaacatttgcattcagtttt 00003057  
<<<<<<<< ||||||||||||||||||||||||||||||||||||||| <<<<<<<<<  
39390983 cacagctccatatctagatatacaggaaaaaacatttgcattcagtttt 39390934





00003603 gttacacttacaggtagaaaaacaaccactatgatgctcatctctagcgtg 00003652  
<<<<<<<< ||||||||||||||||||||||||||||||||||||||||||| <<<<<<<<<  
39390383 gttacacttacaggtagaaaaacaaccactatgatgctcatctctagcgtg 39390334

00003653 gaagagcgtggcagtttttagtctcttccctgggcaagttcagatatactt 00003702  
<<<<<<<< ||||||||||||||||||||||||||||||||||||||||||| <<<<<<<<<  
39390333 gaagagcgtggcagtttttagtctcttccctgggcaagttcagatatactt 39390284

00003703 tcatagttttgttcagctctctgagaaagatctaaatgcatggtgatgtg 00003752  
<<<<<<<< ||||||||||||||||||||||||||||||||||||||||||| <<<<<<<<<  
39390283 tcatagttttgttcagctctctgagaaagatctaaatgcatggtgatgtg 39390234

00003753 tgaggggaggcgagtagcttcagtgtgatgccccacagttctgcataaag 00003802  
<<<<<<<< ||||||||||||||||||||||||||||||||||||||||||| <<<<<<<<<  
39390233 tgaggggaggcgagtagcttcagtgtgatgccccacagttctgcataaag 39390184

00003803 agttctgtgaaatctctgaaaactattctgtgataccttactgctgagt 00003852  
<<<<<<<< ||||||||||||||||||||||||||||||||||||||||||| <<<<<<<<<  
39390183 agttctgtgaaatctctgaaaactattctgtgataccttactgctgagt 39390134

00003853 agagcatgcaagtagtcctggggctggagttgggccaggaccaaagctct 00003902  
<<<<<<<< ||||||||||||||||||||||||||||||||||||||||||| <<<<<<<<<  
39390133 agagcatgcaagtagtcctggggctggagttgggccaggaccaaagctct 39390084

00003903 aagcactgctgcagccctgtgtggaatataacttatctgaagccaaatta 00003952  
<<<<<<<< ||||||||||||||||||||||||||||||||||||||||||| <<<<<<<<<  
39390083 aagcactgctgcagccctgtgtggaatataacttatctgaagccaaatta 39390034

00003953 gtggcattcgcttttctgcctacaggagaggagtaatactgcttgctaact 00004002  
<<<<<<<< ||||||||||||||||||||||||||||||||||||||||||| <<<<<<<<<  
39390033 gtggcattcgcttttctgcctacaggagaggagtaatactgcttgctaact 39389984

00004003 cctgactgacgcaatccttgagatacaatggtcaggatttatacagtgcc 00004052  
<<<<<<<< ||||||||||||||||||||||||||||||||||||||||||| <<<<<<<<<  
39389983 cctgactgacgcaatccttgagatacaatggtcaggatttatacagtgcc 39389934

00004053 ttgaaaaaccaaggagtcatataaatcctaattgggtattaatgggtgttg 00004102  
<<<<<<<< |||||||||||||||||||||||||||||||||||||||| || <<<<<<<<<<  
39389933 ttgaaaaaccaaggagtcatataaatcctaattgggtattaatgg...tg 39389887

00004103 ttattatataactatggtacatgctacctacaacactttttttgtcagtt 00004152  
<<<<<<<< ||||||||||||||||||||||||||||||||||||||||||| <<<<<<<<<<  
39389886 ttattatataactatggtacatgctacctacaacactttttttgtcagtt 39389837

00004153 tacttattattgtttgctcattacatgtgtggaaatagaggtagcagaaa 00004202  
 <<<<<<<< ||||| <<<<<<<<

39389836 tacttattattgtttgctcattacatgtgtggaaatagaggtagcagaaa 39389787

00004203 catgaagtaaattatatgagattccctatttaaaaaaaaaatctatttgtc 00004252  
 <<<<<<<< ||||| <<<<<<<<

39389786 catgaagtaaattatatgagattccctatttaaaaaaaaaatctatttgtc 39389737

00004253 agagtcaggagtaaaaacttgatcatccaatgtagcattctgccccatcag 00004302  
 <<<<<<<< ||||| <<<<<<<<

39389736 agagtcaggagtaaaaacttgatcatccaatgtagcattctgccccatcag 39389687

00004303 gccagccattacttaattagctcctaaatacataagaagtccaattaact 00004352  
 <<<<<<<< ||||| <<<<<<<<

39389686 gccagccattacttaattagctcctaaatacataagaagtccaattaact 39389637

00004353 aggatagtgagcctgacagaaaaacaacagctgcagctgtggttgaat 00004402  
 <<<<<<<< ||||| <<<<<<<<

39389636 aggatagtgagcctgacagaaaaacaacagctgcagctgtggttgaat 39389587

00004403 cagaaaaggtttgggaaatgcagtcctgggttgctgagtaggaaagaaaa 00004452  
 <<<<<<<< ||||| <<<<<<<<

39389586 cagagaaggtttgggaaatgcagtcctgggttggtgagtaggaaagaaaa 39389537

00004453 cagtgtacatgtagctgcaaggtagcagtactgccagtgggtgtgatttgg 00004502  
 <<<<<<<< ||||| <<<<<<<<

39389536 cagtgtacatgtagctgcaaggtagcagtactgccagtgggtgtgatttgg 39389487

00004503 aaacatattaaggcagtgattcaccactttctatctacaggatcagtg 00004552  
 <<<<<<<< ||||| <<<<<<<<

39389486 aaacatattaaggcagtgattcaccactttctatctacaggatcagtg 39389437

00004553 ggttcagaagatggatcaaccacgtctgtgtctgaacagaccctcattga 00004602  
 <<<<<<<< ||||| <<<<<<<<

39389436 ggtttagaagatggatcaaccacgtctgtgtctgaacagaccctcattga 39389387

00004603 tctgaaggtgagaagctcatggaggttaagttgggtgagacagtggctga 00004652  
 <<<<<<<< ||||| <<<<<<<<

39389386 tctgaaggtgagaagctcatggaggttaagttgggtgagacagtggctga 39389337

00004653 tgggtcattggcctaattgggactgacgctgaacgtccctgaggtacagat 00004702  
 <<<<<<<< ||||| <<<<<<<<

39389336 tgggtcattggcctaattgggactgacgctgaacgtccctgaggtacagat 39389287
